# Supplementary material for: Photo-Reduction of CO2 by VIS Light on Polythiophene-ZSM-5 Zeolite Hybrid Photo-Catalyst
Source: Molecules. 2019 Mar 12;24(5):992. doi: 10.3390/molecules24050992 (PMC6429064; doi:10.3390/molecules24050992)
Supplement: Supplementary file 1 [file molecules-24-00992-s001.pdf]

# Photo-Reduction of CO<sub>2</sub> by VIS Light on Polythiophene-ZSM-5 Zeolite Hybrid Photo-Catalyst

Jana Kianička <sup>1</sup>, Gabriel Čík <sup>1,\*</sup>, František Šeršen <sup>2,\*</sup>, Ivan Špánik <sup>3</sup>, Robert Sokolík <sup>2</sup> and Juraj Filo <sup>2,\*</sup>

<sup>1</sup> Department of Environmental Engineering, Faculty of Chemical and Food Technology, Slovak University of Technology in Bratislava, Radlinského 9, SK-812 37 Bratislava, Slovakia; jana@kianicka.name

<sup>2</sup> Institute of Chemistry, Faculty of Natural Science, Comenius University in Bratislava, Ilkovičova 6, SK-842 15 Bratislava, Slovakia; robert.sokolik@uniba.sk

<sup>3</sup> Department of Analytical Chemistry, Faculty of Chemical and Food Technology, Slovak University of Technology in Bratislava, Radlinského 9, SK-812 37 Bratislava, Slovakia; ivan.spanik@stuba.sk

\* Correspondence: gabriel.cik@stuba.sk (G.Č.); f.sersen@gmail.com (F.Š.); juraj.filo@uniba.sk (J.F.)

## Electronic Supplementary information (ESI)

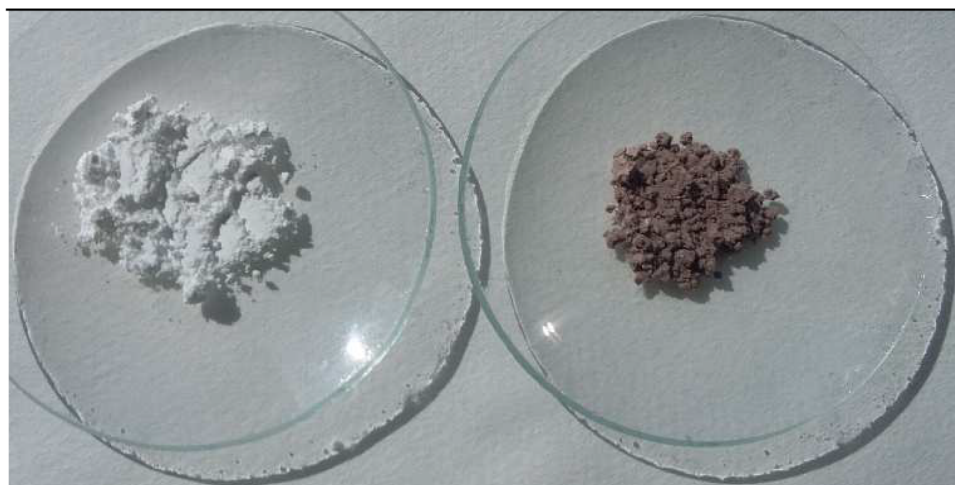

**Figure 1.** Left: Pure Na-ZMS-5 before reaction. Right: Photo-catalyst prepared without participation of ultrasound. Small amount of  $\text{FeCl}_3$  ( $\sim 0.05 \text{ mol L}^{-1}$ ) was present in reaction mixture.

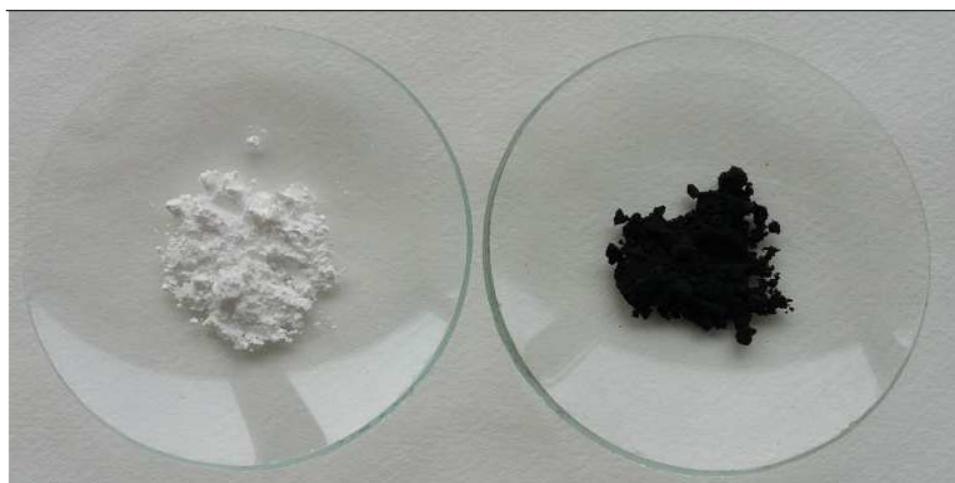

**Figure S2.** Left: Pure Na-ZMS-5 before reaction. Right: Photo-catalyst prepared with participation of ultrasound.  $\text{FeCl}_3$  ( $0.25 \text{ mol L}^{-1}$ ) was present in reaction mixture.

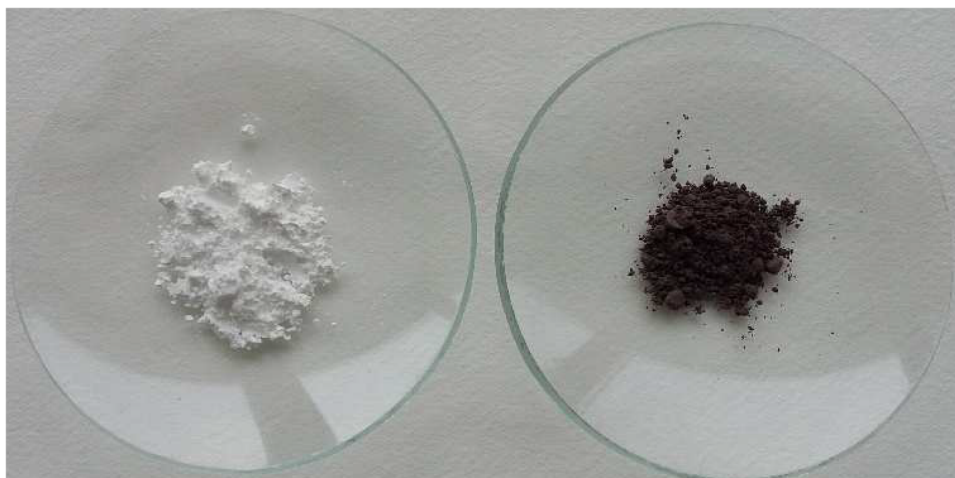

**Figure S3.** Left: Pure Na-ZMS-5 before reaction. Right: Photo-catalyst prepared with participation of ultrasound doped with  $\text{FeCl}_3$  ( $0.55 \text{ mol L}^{-1}$ ).

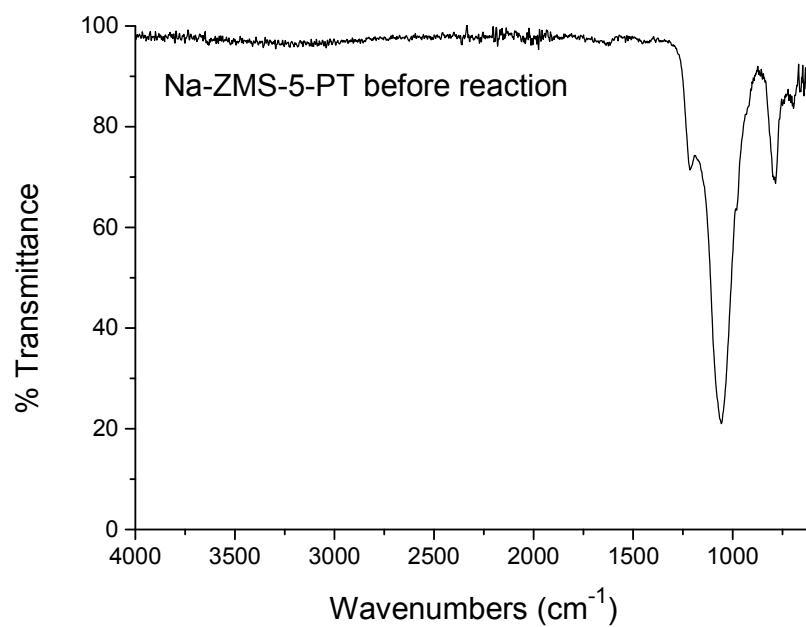

**Figure S4.** FT-IR spectrum of photo-catalyst before reaction.

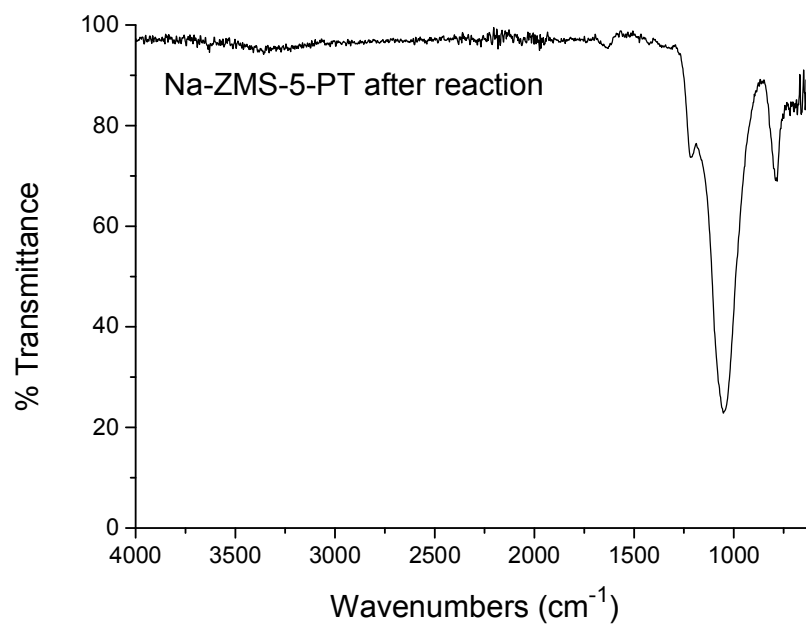

**Figure S5.** FT-IR spectrum of photo-catalyst after reaction.
